# Supplementary material for: Bimetallic AgPt Nanoalloys as an Electrocatalyst for Ethanol Oxidation Reaction: Synthesis, Structural Analysis, and Electro-Catalytic Activity
Source: MDPI journal article supplement (doi:10.3390/nano13081396), 2023-04-18
Supplement: s1 [file s1]

## Bimetallic AgPt Nanoalloys as an Electrocatalyst for Ethanol Oxidation Reaction: Synthesis, Structural Analysis, and Electro-Catalytic Activity

According to Sigma-Aldrich provender information, the technical specifications of the Pt/C commercial electrocatalyst (PRD.0.ZQ5.10000029756) are 20% wt. of Pt loading and crystallite size  $\leq 5$  nm confirmed by TGA and XRD techniques, respectively. On the other hand, the particle distribution was determined by the SEM-SE technique (Figure S1). The micrograph shows particles well dispersed and particles agglomeration on different zones of the carbon support.

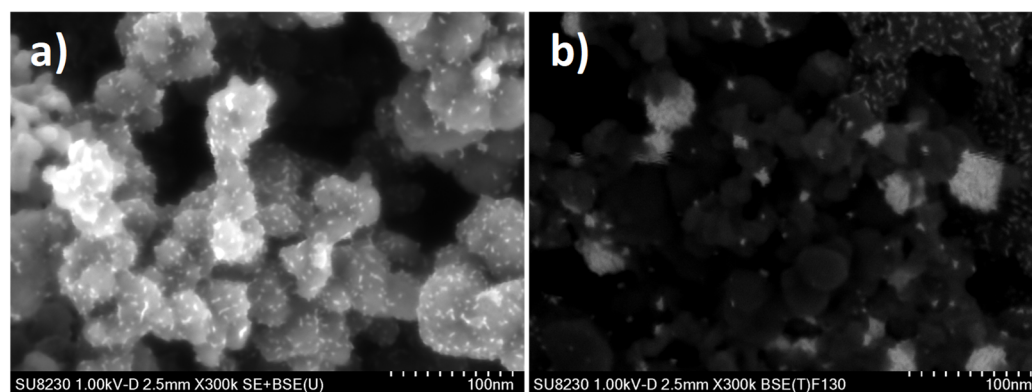

**Figure S1.** Low-magnification SEM micrographs of Pt/C commercial electrocatalyst purchased from Sigma-Aldrich; a) Secondary electrons image and b) Backscattered electron image.

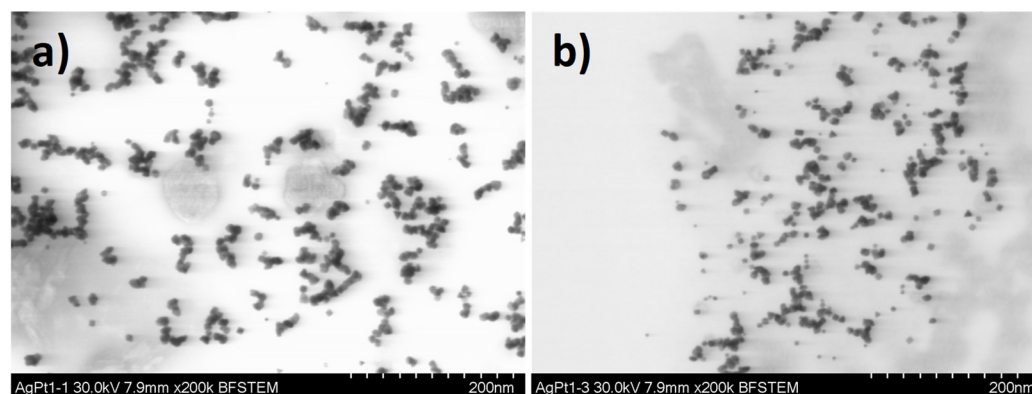

**Figure S2.** Low-magnification BF-STEM micrographs of a) AgPt (1:1) and b) AgPt (1:3) BNPs.

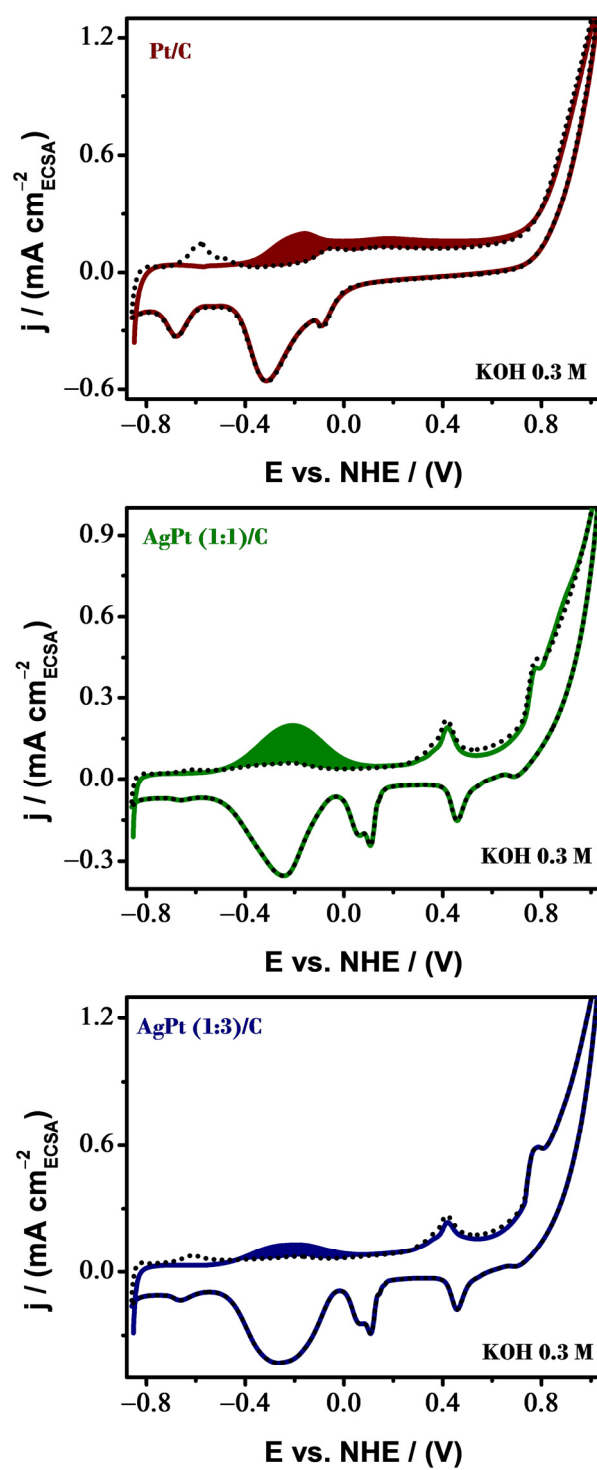

**Figure S3.** Cyclic voltammograms in alkaline media recorded consecutively after chronoamperometry (CA) measurements for Pt/C, AgPt (1:1)/C, and AgPt (1:3)/C electrocatalysts.

**Table S1.** Comparison of the catalytic activity of ethanol oxidation using Pt-based materials.

| Material                           | Morphology/size               | Test conditions            | Catalytic activity       | Reference |
|------------------------------------|-------------------------------|----------------------------|--------------------------|-----------|
| AgPt (1:3)/C                       | Spherical nanoparticles/10 nm | 0.3 M KOH + 1.0 M Ethanol  | 3.17 mA cm <sup>-2</sup> | This work |
| PtAg                               | Nanotubes/80 nm               | 1.0 NaOH + 1.0 M Ethanol   | 1.97 mA cm <sup>-2</sup> | [1]       |
| PtRu NWs/C                         | Nanowires/                    | 0.1 M KOH + 0.5 M Ethanol  | 3.78 mA cm <sup>-2</sup> | [2]       |
| PdPt/C                             | Nanoparticles/17 nm           | 0.3 M KOH + 1.0 M Ethanol  | 3.27 mA cm <sup>-2</sup> | [3]       |
| PtCu NCs/CB                        | Nanocubes/14 nm               | 1.0 M KOH + 1.0 M Ethanol  | 6.75 mA cm <sup>-2</sup> | [4]       |
| Pt <sub>3</sub> Pd <sub>2</sub> /C | Nanoparticles/3.4 nm          | 0.1 M NaOH + 0.1 M Ethanol | 4.7 mA cm <sup>-2</sup>  | [5]       |
| Pt <sub>4</sub> Pd/C               | Nanoparticles/3.5 nm          | 0.1 M NaOH + 0.1 M Ethanol | 3.4 mA cm <sup>-2</sup>  | [5]       |
| PtPbPd/C                           | Nanowires                     | 0.5 M KOH + 0.5 M Ethanol  | 2.78 mA cm <sup>-2</sup> | [6]       |
| PtPd/C                             | Nanowires                     | 0.5 M KOH + 0.5 M Ethanol  | 2.66 mA cm <sup>-2</sup> | [6]       |
| PtPb/C                             | Nanowires                     | 0.5 M KOH + 0.5 M Ethanol  | 1.68 mA cm <sup>-2</sup> | [6]       |

## References

- Gu, X.; Wang, C.; Yang, L.; Yang, C. 3d porous ptag nanotubes for ethanol electro-oxidation. *Journal of Nanoscience and Nanotechnology* **2017**, *17*, 2843-2847.
- Yin, K.; Chao, Y.; Zeng, L.; Li, M.; Liu, F.; Guo, S.; Li, H. Ultrathin ptru nanowires as efficient and stable electrocatalyst for liquid fuel oxidation reactions. *Energy Mater. Adv.* **2022**, *2022*.
- Higareda, A.; Mares-Briones, F.; Rosas, G.; Pérez, R.; Esparza, R. Enhanced durability of pdpt/c electrocatalyst during the ethanol oxidation reaction in alkaline media. *J. Solid State Electrochem.* **2022**, *26*, 2143-2151.
- Liu, D.; Huang, H.-Z.; Zhu, Z.; Li, J.; Chen, L.-W.; Jing, X.-T.; Yin, A.-X. Promoting the electrocatalytic ethanol oxidation activity of pt by alloying with cu. *Catalysts* **2022**, *12*, 1562.
- Jadali, S.; Kamyabi, M.A.; Solla-Gullón, J.; Herrero, E. Effect of pd on the electrocatalytic activity of pt towards oxidation of ethanol in alkaline solutions. *Appl. Sci.* **2021**, *11*, 1315.

- 
6. Duan, J.-J.; Feng, J.-J.; Zhang, L.; Yuan, J.; Zhang, Q.-L.; Wang, A.-J. Facile one-pot aqueous fabrication of interconnected ultrathin ptpbpd nanowires as advanced electrocatalysts for ethanol oxidation and oxygen reduction reactions. *Int. J. Hydrog.* **2019**, *44*, 27455-27464.
